# Supplementary material for: A copper complex bearing a TEMPO moiety as catalyst for the aerobic oxidation of primary alcohols
Source: Royal Society of Chemistry journal article supplement (doi:10.1039/b802109k), 2008-01-01
Supplement: b802109k.pdf [file b802109k.pdf]

## Electronic Supplementary Information to the Dalton Trans paper:

# A copper complex bearing a TEMPO moiety as catalyst for the aerobic oxidation of primary alcohols

Zhengliang Lu,<sup>a</sup> José Sánchez Costa,<sup>a</sup> Olivier Roubeau,<sup>b</sup> Ilpo Mutikainen,<sup>c</sup> Urho Turpeinen,<sup>c</sup> Simon J. Teat,<sup>d</sup> Patrick Gamez,<sup>a</sup> and Jan Reedijk<sup>\*a</sup>

### Table of Contents

|                                                                                                                                                                                                       |   |
|-------------------------------------------------------------------------------------------------------------------------------------------------------------------------------------------------------|---|
| <b>Table S2.</b> Crystal data and structure refinement for compounds <b>6a</b> and <b>6b</b>                                                                                                          | 2 |
| <b>Figure S1.</b> ORTEP view of the crystal structure of <b>6a</b>                                                                                                                                    | 3 |
| <b>Figure S2.</b> ORTEP view of the crystal structure of <b>6b</b>                                                                                                                                    | 3 |
| <b>Table S3.</b> Crystal data and structure refinement for compounds <b>7a</b> (pypzt-1) and <b>7b</b> (pypzt-2)                                                                                      | 4 |
| <b>Figure S3.</b> ORTEP view of the crystal structure of <b>7a</b> (pypzt-1)                                                                                                                          | 5 |
| <b>Figure S4.</b> ORTEP view of the crystal structure of <b>7b</b> (pypzt-2)                                                                                                                          | 5 |
| X-ray Crystallographic Analysis and Data Collection for <b>6a</b> , <b>6b</b> , <b>7a</b> and <b>7b</b>                                                                                               | 6 |
| <b>Table S4.</b> Contact distances for the [Cu <sup>I</sup> Br <sub>2</sub> ] <sup>-</sup> •••triazine (Cg10) and the [Cu <sup>I</sup> Br <sub>2</sub> ] <sup>-</sup> •••pyridine (Cg11) interactions | 7 |
| <b>Table S5.</b> Contact distances for the acetone(l.p.)•••triazine (Cg7) interactions                                                                                                                | 7 |
| Visible spectroscopic studies                                                                                                                                                                         | 8 |

<sup>a</sup> Leiden Institute of Chemistry, Leiden University, P.O. Box 9502, 2300 RA Leiden, The Netherlands. Fax: +31 715274671; E-mail: reedijk@chem.leidenuniv.nl

<sup>b</sup> Université Bordeaux 1, CNRS-CRPP, 115 avenue du dr. A. Schweitzer, 33600 Pessac, France.

<sup>c</sup> University of Helsinki, Department of Chemistry, Laboratory of Inorganic Chemistry, Helsinki, 00014, Finland.

<sup>d</sup> ALS, Berkeley Lab, 1 Cyclotron Road, MS2-400, Berkeley, CA 94720, USA.

**Table S1.** Crystal data and structure refinement for **6a** and **6b**.

| Compound                                                | <b>6a</b>                                          | <b>6b</b>                                          |
|---------------------------------------------------------|----------------------------------------------------|----------------------------------------------------|
| formula                                                 | C <sub>25</sub> H <sub>20</sub> ClN <sub>7</sub> O | C <sub>25</sub> H <sub>20</sub> ClN <sub>7</sub> O |
| Fw (g mol <sup>-1</sup> )                               | 469.93                                             | 469.93                                             |
| cryst size (mm <sup>3</sup> )                           | 0.52 × 0.45 × 0.20                                 | 0.20 × 0.10 × 0.07                                 |
| cryst color                                             | colorless                                          | colorless                                          |
| Temperature (K)                                         | 150(2)                                             | 193(2)                                             |
| cryst syst, space group                                 | monoclinic, <i>C2/c</i>                            | triclinic, <i>P</i> -1                             |
| <i>a</i> (Å)                                            | 26.644(5)                                          | 8.500(2)                                           |
| <i>b</i> (Å)                                            | 8.943(2)                                           | 9.483(2)                                           |
| <i>c</i> (Å)                                            | 19.223(4)                                          | 15.043(3)                                          |
| <i>α</i> (deg)                                          | 90.00                                              | 99.31(3)                                           |
| <i>β</i> (deg)                                          | 97.61(3)                                           | 93.73(3)                                           |
| <i>γ</i> (deg)                                          | 90.00                                              | 102.40(3)                                          |
| volume (Å <sup>3</sup> )                                | 4539.8(16)                                         | 1162.4(4)                                          |
| <i>Z</i>                                                | 8                                                  | 2                                                  |
| calcd density (g cm <sup>-3</sup> )                     | 1.375                                              | 1.343                                              |
| F(000)                                                  | 1952                                               | 488                                                |
| abs coeff (mm <sup>-1</sup> )                           | 0.202                                              | 0.197                                              |
| <i>θ</i> for data collection (deg)                      | 0.998–27.878                                       | 2.83–25.68                                         |
| rflns collected ( <i>R</i> <sub>int</sub> )             | 28018 (0.0718)                                     | 11933 (0.1386)                                     |
| data/params                                             | 5398/307                                           | 4212/308                                           |
| goodness of fit on F <sup>2</sup>                       | 1.021                                              | 0.904                                              |
| R1 (wR2) [ <i>I</i> > 2σ( <i>I</i> )]                   | 0.0430 (0.0982)                                    | 0.0642 (0.1232)                                    |
| R1 (wR2) (all data)                                     | 0.0650 (0.1104)                                    | 0.2916 (0.1931)                                    |
| largest diff. peak and hole ( <i>e</i> Å <sup>3</sup> ) | 0.256 and -0.377                                   | 0.284 and -0.307                                   |

**Figure S1.** ORTEP view (thermal ellipsoids drawn at the 30% probability level) of compound **6a**.

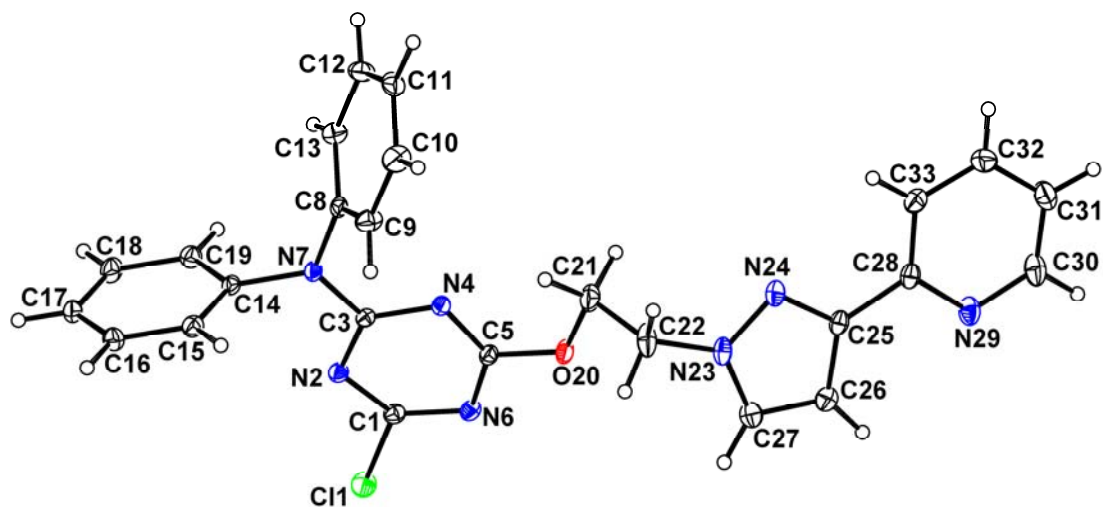

**Figure S2.** ORTEP view (thermal ellipsoids drawn at the 30% probability level) of compound **6b**.

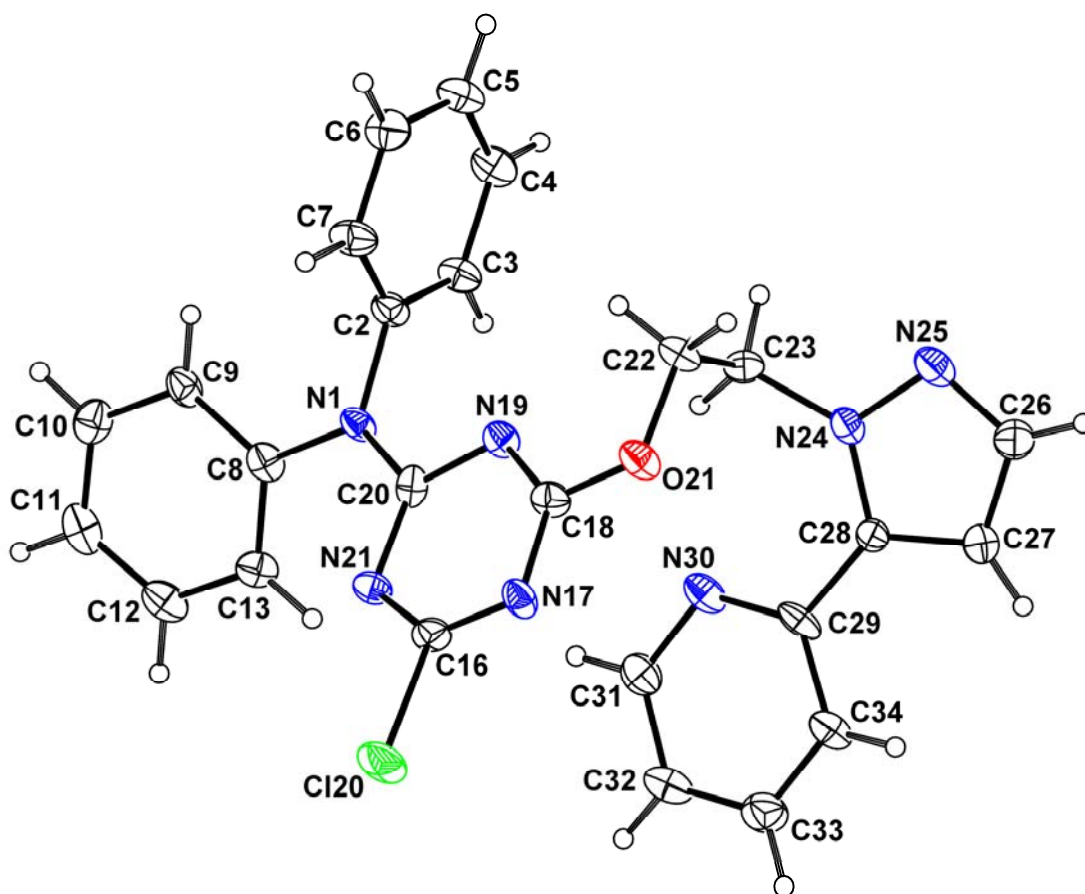

**Table S2.** Crystal data and structure refinement for **7a** and **7b**

| Compound                                                | <b>7a</b>                                                      | <b>7b</b>                                                     |
|---------------------------------------------------------|----------------------------------------------------------------|---------------------------------------------------------------|
| formula                                                 | C <sub>68</sub> H <sub>78</sub> N <sub>18</sub> O <sub>5</sub> | C <sub>36</sub> H <sub>38</sub> N <sub>9</sub> O <sub>3</sub> |
| Fw (g mol <sup>-1</sup> )                               | 1227.48                                                        | 648.79                                                        |
| cryst size (mm <sup>3</sup> )                           | 0.45 × 0.23 × 0.12                                             | 0.35 × 0.25 × 0.05                                            |
| cryst color                                             | pink                                                           | pink                                                          |
| Temperature (K)                                         | 150(2)                                                         | 150(2)                                                        |
| cryst syst, space group                                 | monoclinic, <i>P</i> 2 <sub>1</sub> / <i>c</i>                 | triclinic, <i>P</i> -1                                        |
| <i>a</i> (Å)                                            | 7.7743(16)                                                     | 9.4680(19)                                                    |
| <i>b</i> (Å)                                            | 29.216(6)                                                      | 12.639(3)                                                     |
| <i>c</i> (Å)                                            | 14.248(3)                                                      | 15.721(3)                                                     |
| <i>α</i> (deg)                                          | 90.00                                                          | 106.96(3)                                                     |
| <i>β</i> (deg)                                          | 90.85(3)                                                       | 95.71(3)                                                      |
| <i>γ</i> (deg)                                          | 90.00                                                          | 107.34(3)                                                     |
| volume (Å <sup>3</sup> )                                | 3236.0(11)                                                     | 1681.4(8)                                                     |
| <i>Z</i>                                                | 2                                                              | 2                                                             |
| calcd density (g cm <sup>-3</sup> )                     | 1.260                                                          | 1.281                                                         |
| F(000)                                                  | 1304                                                           | 690                                                           |
| abs coeff (mm <sup>-1</sup> )                           | 0.083                                                          | 0.085                                                         |
| <i>θ</i> for data collection (deg)                      | 2.71–27.54                                                     | 0.998–27.485                                                  |
| rflns collected ( <i>R</i> <sub>int</sub> )             | 13021 (0.0246)                                                 | 14725 (0.0583)                                                |
| data/params                                             | 7332/415                                                       | 7687/460                                                      |
| goodness of fit on F <sup>2</sup>                       | 1.053                                                          | 1.017                                                         |
| R1 (wR2) [ <i>I</i> > 2σ( <i>I</i> )]                   | 0.0531 (0.1379)                                                | 0.0598 (0.1358)                                               |
| R1 (wR2) (all data)                                     | 0.0835 (0.1549)                                                | 0.1285 (0.1714)                                               |
| largest diff. peak and hole ( <i>e</i> Å <sup>3</sup> ) | 0.294 and -0.290                                               | 0.433 and -0.275                                              |

**Figure S3.** ORTEP view (thermal ellipsoids drawn at the 30% probability level) of compound **7a** (ligand pypzt-1). A half-occupied lattice water molecule is omitted for clarity. Hydrogen atoms are omitted for clarity.

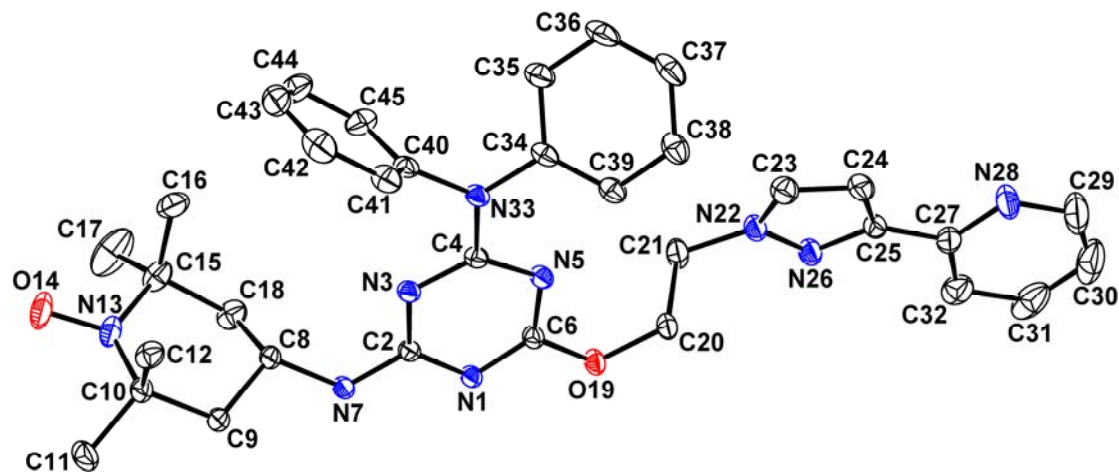

**Figure S4.** ORTEP view (thermal ellipsoids drawn at the 30% probability level) of compound **7b** (ligand pypzt-2). A lattice ethylacetate molecule disordered over two positions is not shown for clarity. Hydrogen atoms are omitted for clarity.

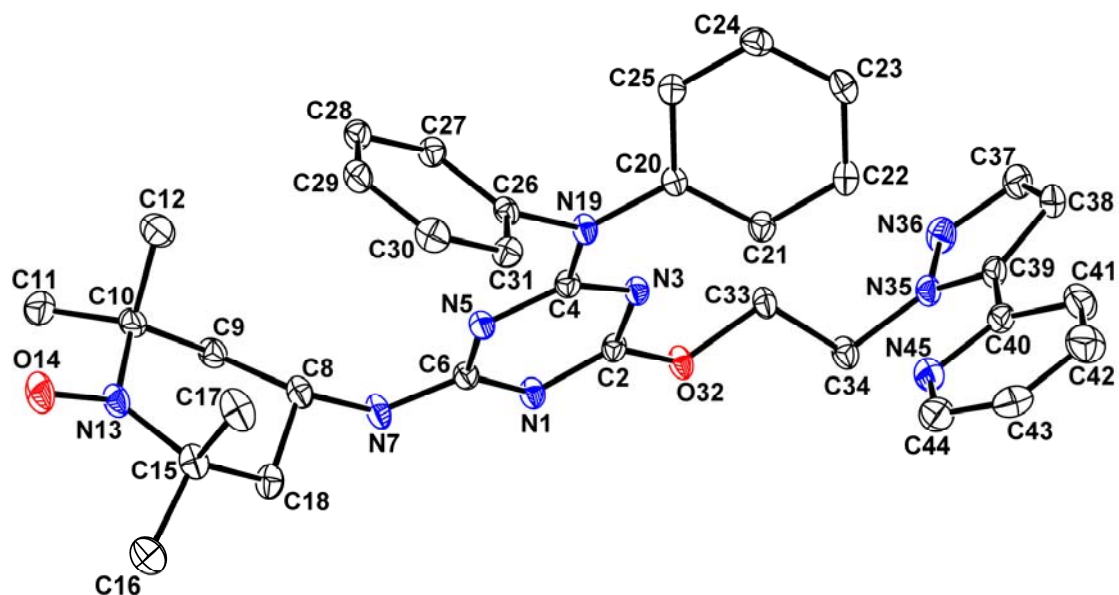

### Structural determination

The molecular structure of compounds **6a**, **6b**, **7a** and **7b** were determined by single-crystal X-ray diffraction methods. Crystallographic data and refinement details are given in Tables S2 and S3.

X-ray crystallographic data for **6a**, **7a** and **7b** were collected on a Nonius Kappa CCD diffractometer with graphite-monochromated Mo K $\alpha$  radiation ( $\lambda = 0.71073 \text{ \AA}$ ). Suitable crystals were affixed to the end of a glass fiber using silicone grease and transferred to the goniostat. DENZO-SMN (Z. Otwinowski, W. Minor, *Methods Enzymol.* **1996**, 276, 307) was used for data integration and SCALEPACK<sup>Error! Bookmark not defined.</sup> corrected data for Lorentz-polarisation effects. The structures were solved by direct methods and refined by a full-matrix least-squares method on  $F^2$  using the SHELXTL crystallographic software package ((a) G. M. Sheldrick, *SHELXL97*, Program for Crystal Structure Refinement; University of Göttingen: Göttingen, Germany, **1997**; (b) G. M. Sheldrick, *SHELXS97*, Program for Crystal Structure Solution; University of Göttingen: Göttingen, Germany, **1997**).

X-ray crystallographic data for **6b** were collected on Nonius KappaCCD diffractometer and the crystal was mounted to the glass fiber using the oil drop method (T. Kottke and D. Stalke, *J. Appl. Crystallogr.*, 1993, **26**, 615-619) and data were collected at 193 K. The intensity data were corrected for Lorentz and polarization effects and for absorption. The nonhydrogen atoms were refined anisotropically. The H atoms were situated in calculated positions and refined using riding model.

Crystallographic data **6a**, **6b**, **7a** and **7b** have been deposited in the Cambridge Structural Database. CCDC 676753–676756 contain the supplementary crystallographic data for **6a**, **6b**, **7a** and **7b**, respectively. These data can be obtained free of charge via <http://www.ccdc.cam.ac.uk/conts/retrieving.html> or from the Cambridge Crystallographic Data Centre, 12 Union Road, Cambridge CB2 1EZ, UK; fax: +44 1223-336-033; or e-mail: deposit@ccdc.cam.ac.uk.

**Table S3.** Distances characterising the interaction between  $\text{Br}_4(\text{Cu}^{\text{I}}\text{Br}_2^-)$  and the atoms of the triazine ring Cg10, and the interaction between  $\text{Br}_4(\text{Cu}^{\text{I}}\text{Br}_2^-)$  and the atoms of the pyridine ring Cg11 (see Figures 2A and 2B)

| Atoms in contact | Distance (Å) |
|------------------|--------------|
| <i>Cg10</i>      |              |
| Br4...N51        | 3.785        |
| Br4...C52        | 3.933        |
| Br4...N53        | 4.088        |
| Br4...C54        | 4.058        |
| Br4...N55        | 3.922        |
| Br4...C56        | 3.756        |
| <i>Cg11</i>      |              |
| Br4...C65        | 4.076        |
| Br4...N66        | 3.989        |
| Br4...C67        | 3.912        |
| Br4...C68        | 3.961        |
| Br4...C69        | 4.067        |
| Br4...C70        | 4.119        |

**Table S4.** Distances characterising the interaction between N1S(acetonitrile) and the atoms of the triazine ring Cg7 (see Figures 2C and 2D)

| Atoms in contact | Distance (Å) |
|------------------|--------------|
| N1S...N1         | 3.398(10)    |
| N1S...C2         | 3.550(11)    |
| N1S...N3         | 3.772(11)    |
| N1S...C4         | 3.822(12)    |
| N1S...N5         | 3.673(11)    |
| N1S...C6         | 3.375(11)    |

### **Visible spectroscopic studies**

For these investigations, 0.01mmol of the ligand was dissolved in 3 mL of acetonitrile 0.01mmol of CuBr<sub>2</sub> was subsequently added and the visible spectrum of the resulting complex solution was recorded on a Perkin-Elmer Lambda 900 spectrophotometer, using the diffuse reflectance technique, with MgO as a reference. Next, 0.01 mmol of base was added to the previous mixture and the ensuing solution was measured.
